# Supplementary material
Source: MDPI journal article supplement (https://www.mdpi.com/2037-0164/15/1/12)
Supplement: s1 [file s1 › ijpb-2829797-supplementary.pdf]

## Antonio Blanco

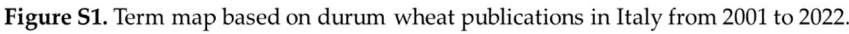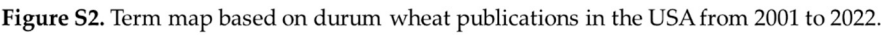

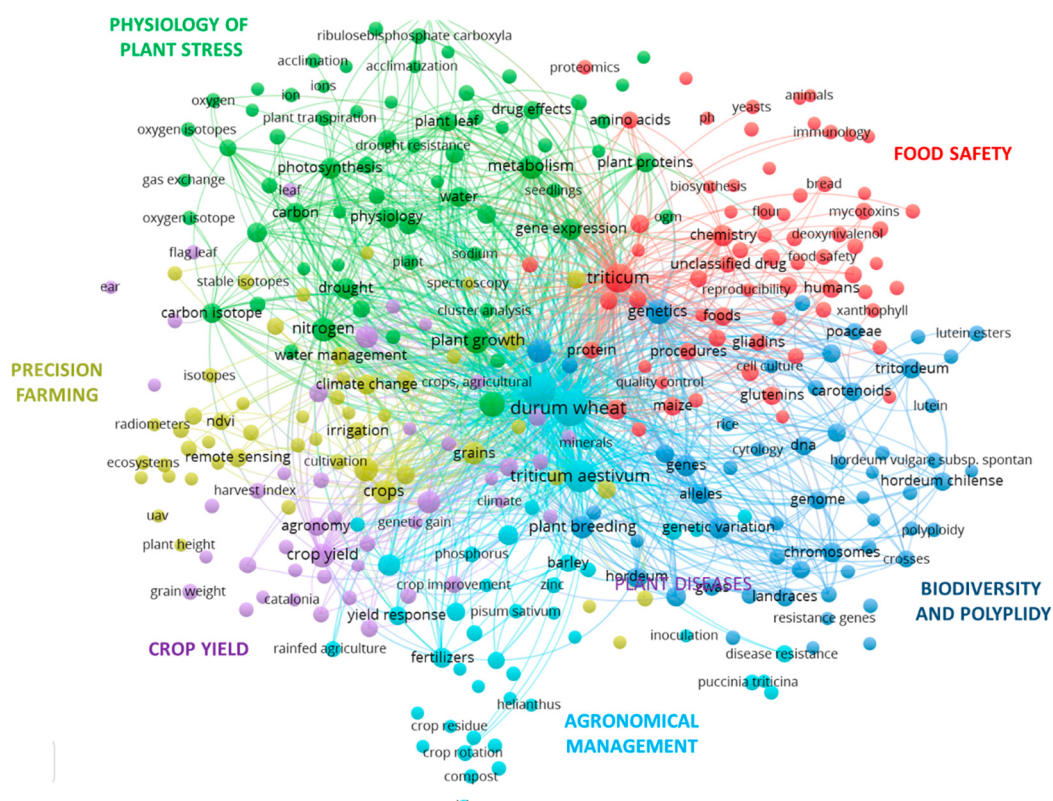

Figure S3. Term map based on durum wheat publications in Spain from 2001 to 2022.

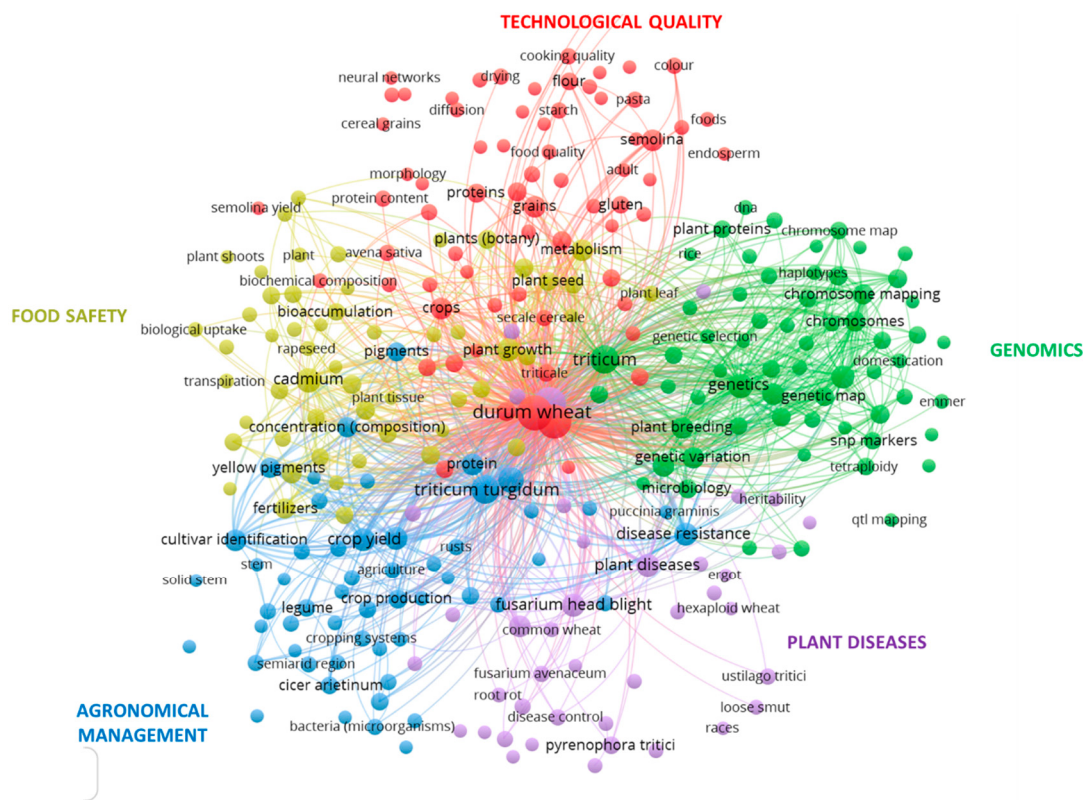

Figure S4. Term map based on durum wheat publications in Canada from 2001 to 2022.
